1 **Title: How clonal are bacteria over time?**

2

3 **Author: B. Jesse Shapiro<sup>1</sup>**

4

5 **Affiliation**

6 1. Département de sciences biologiques, Université de Montréal, Montréal, QC H3C 3J7,

7 Canada

8 \* [jesse.shapiro@umontreal.ca](mailto:jesse.shapiro@umontreal.ca)

9

10

11

12 **Abstract**

13 Bacteria and archaea reproduce clonally (vertically), but exchange genes by recombination

14 (horizontal transfer). Recombination allows adaptive mutations or genes to spread within (or

15 between) species. Clonality – the balance between vertical and horizontal inheritance – is

16 therefore a key microbial trait, determining how quickly a population can adapt. Here, I consider

17 whether clonality can be considered a stable trait of a given population. In some cases, clonality

18 changes over time: non-clonal (recombining) populations can give rise to clonal expansions.

19 However, an analysis of time-course metagenomic data suggests that a bacterial population's past

20 clonality is indicative of its future clonality. Thus, a population's evolutionary potential – whether

21 it is likely to retain genetic diversity or not – can in principle be predicted from its past.

## 22 **Introduction**

23 Here, I revisit the question posed in the title of a classic paper by John Maynard Smith and  
24 colleagues [1]: How clonal are bacteria? More specifically how does clonality vary among  
25 different microbial populations and over time? First, what do we mean by clonality? Perfectly  
26 clonal bacteria replicate by cell division (vertical descent) and evolve by random mutations that  
27 occur during DNA replication. There is negligible horizontal transfer of DNA by recombination  
28 across the resulting tree of vertical descent. Very few (if any) natural bacterial populations fit this  
29 theoretical definition of clonality. Or, as discussed below, they might only fit it for a short amount  
30 of time. However, knowing where a bacterial population happens to fall along a spectrum of  
31 clonality can help us understand its biology, and even make predictions about its evolution.

32 The opposite of clonality is panmixis – a situation in which the rate of horizontal transfer  
33 is higher than the rate of vertical cell division [1,2]. However, rates of horizontal transfer  
34 (recombination) vary widely across the genome, such that a population can be mostly clonal,  
35 except for a few loci in the genome. These loci came to be termed genomic islands – a metaphor I  
36 will build upon below. Some of the first islands identified were called pathogenicity islands  
37 because they contained virulence factors [3]. However, non-pathogenic environmental bacteria  
38 also contain islands, conferring adaptation to different ecological niches. For example, genes in  
39 *Prochlorococcus* genomic islands confer adaptation to light and nutrient conditions [4,5]. But  
40 islands need not confer niche adaptation to their host genome; they can be neutral to host fitness  
41 or even detrimental, selfish parasites. Here, I define genomic islands broadly as any piece of  
42 DNA that is transferred horizontally (by either homologous or nonhomologous recombination)  
43 from cell to cell and therefore evolves independently (*i.e.* is unlinked) from the rest of the  
44 genome.

45

46 **Are some islands really peninsulas?**

47 In the classic analogy, an island is totally disconnected from the mainland, meaning that genes in  
48 the island evolve independently of the genome (**Table 1**). Examples of islands that fit this strict  
49 independence might include integrated phages and other “selfish” elements, or genes that reside  
50 in a particular niche but not in a particular genome (*e.g.* a gene ecology model [6]). Peninsulas  
51 provide an analogy that might better describe how islands are related to microbial genomes. A  
52 peninsula (or “presque-île,” from the French for “almost island”) is a geographic term for a very  
53 narrow strip of land connected to (but distinct from) the mainland. An island is evolutionarily  
54 independent of the mainland genome, but their fates may become linked, forming a peninsula. For  
55 example, a bacterium may acquire a gene from a vast microbial gene pool. This gene allows the  
56 bacterium to invade a new ecological niche, triggering a clonal expansion in which the fate of the  
57 gene and its new host genome are linked, at least for the duration of the clonal expansion. One  
58 such example could be *Yersinia pestis*, which acquired a single gene allowing flea-borne  
59 transmission and triggering a clonal expansion in the form of Plague pandemics [7]. Another  
60 peninsula, the prophage-encoded cholera toxin, and its links to the mainland *Vibrio cholerae*  
61 genome [8,9], is discussed below.

62

### 63 **Are some genomes archipelagos?**

64 The very concept of one or a few islands implies a contrast with the large, clonal genomic  
65 mainland or continent. But some microbial genomes may contain so many islands that there is no  
66 mainland, only a vast archipelago (**Table 1**). A striking recent example is a population of  
67 hotspring cyanobacteria in which virtually every gene in the genome evolved independently due  
68 to frequent recombination [10], leading the authors to call the population “quasi-sexual”  
69 (panmictic). The Asian ocean population of *Vibrio parahaemolyticus* also form a panmictic gene  
70 pool, with each recombination block of ~1.8 kbp evolving independently [11]. Similarly, almost  
71 every gene in a population of *Vibrio cyclitrophicus* genomes showed signals of recombination  
72 over relatively recent time scales [12]. Such apparently high rates of recombination in natural

73 populations were mysterious at first, contradicting recombination rates measured in the lab  
74 [13,14] and predicted by theory [15,16]. However, new models (discussed below) suggest  
75 mechanisms capable of explaining such surprisingly panmictic populations [17,18].

76

### 77 **Clonal expansions from panmictic pools**

78 Archipelagos are not necessarily static over time; they can sometimes coalesce into continents.  
79 Given the right ecological opportunity, a genome from a panmictic gene pool can escape the  
80 "gravitational pull" of recombination and take off into a clonal expansion (resulting in "epidemic"  
81 population structure [1]). An example mentioned earlier is *V. cholerae*, a genetically diverse  
82 group of coastal marine bacteria, some of which cause cholera. Virulence is mainly determined  
83 by two loci in the genome: the cholera toxin and the toxin-coregulated pilus. Both genes are  
84 frequently gained and lost by recombination [19,20], but are always found in one lineage of *V.*  
85 *cholerae* – the lineage causing severe disease with pandemic potential, known as the phylocore  
86 genome (PG) group [9]. It remains a mystery why the PG lineage evolved once, and only once. If  
87 PG *V. cholerae* really did evolve just once, this would be surprising because *V. cholerae* draws on  
88 a diverse, global gene pool and can be considered panmictic [21]. Therefore multiple different  
89 lineages would be expected to acquire the two (or perhaps a handful of) genetic elements required  
90 for pandemic disease. This leads to the hypothesis that pandemic cholera emergence is *selection*  
91 *limited* rather than *diversity limited*. In other words, benign *V. cholerae* strains constantly acquire  
92 virulence genes. However, these strains rarely encounter the right ecological niche to flourish,  
93 *e.g.* a human population consuming brackish water. "The right niche" has appeared a few times in  
94 human history: for example in India in the 1800s, when the Classical lineage evolved, and again  
95 in Indonesia in the 1950s, when the El Tor lineage evolved [22]. El Tor and Classical lineages  
96 have different cholera toxin alleles, but both evolved from within the PG group, suggesting that  
97 the PG genomic background is adapted to acquire and exploit virulence genes. When the "right"  
98 conditions appear, the PG lineage, along with its virulence factors, takes off in a clonal

99 expansions which continue to wreak havoc today (*e.g.* cholera pandemics from the 1800s to  
100 today, all caused by the PG clonal group). The virulence factors, previously islands in an  
101 archipelago, became a peninsula connected to the PG mainland. The linkage between virulence  
102 factors and PG remains imperfect because different variants of the cholera toxin continue to flow  
103 in and out of the PG continent [9,19]; hence the toxin remains a peninsula, not firmly part of the  
104 mainland.

105 *V. cholerae* is a particularly well-characterized example of a panmictic gene pool giving  
106 rise to a clonal expansion, but similar evolutionary dynamics are seen in other pathogens as well.  
107 For example, enterotoxigenic *Escherichia coli* (ETEC) seems to behave similarly, with deep  
108 branches of the phylogeny obscured by frequent recombination and plasmid exchange, but more  
109 recent branches experiencing mostly clonal descent, with tight linkage between virulence factors  
110 and the genomic mainland [23]. These observations are consistent with an ancient, diverse  
111 panmictic gene pool giving rise to clonal expansions, which can last for decades or centuries.

112

### 113 **The balance between recombination and selection**

114 Let us consider the evolutionary forces that determine clonality: natural selection and  
115 recombination. The effect of recombination on clonality is straightforward: more recombination  
116 means less clonality. The effect of natural selection is more complex, but is defined here simply  
117 as a force which favors clonal expansions of adaptive mutants within an ecological niche. When  
118 driven by ecological selection, clonal expansions are called selective sweeps, in which one clone  
119 outcompetes all others, purging genetic diversity in the population [15,16].

120 Recombination and selection interact to determine the clonality of a population.

121 Recombination rates depend both on the ability of DNA to enter a cell and be incorporated into  
122 the genome (the baseline rate) and the ability of that DNA to be retained by a balance of genetic  
123 drift and natural selection (the realized rate). Some bacteria, such as *Helicobacter pylori*, have  
124 realized recombination rates that are much higher than point mutation rates, exchanging at least

125 10% of their genome within a single four-year human infection [24]. Others, such as  
126 *Staphylococcus aureus* [25,26] and *Mycobacterium tuberculosis* [27-29] are decidedly more  
127 clonal. Recombination rates (both realized and baseline) vary widely across the genome. Of 10  
128 pathogenic bacterial species studied, all had identifiable recombination 'hot' regions, although  
129 their length, genomic location and gene content varied [30]. Genes of different functions had  
130 different realized recombination rates, implying a role for natural selection on gene function in  
131 determining whether newly acquired genes are retained.

132

### 133 **Modeling the recombination-selection balance**

134 When rates of recombination are relatively low compared to rates of natural selection ( $s$ ) on  
135 adaptive genes within niches, entire genomes will sweep to fixation before they can be shuffled  
136 by recombination. The  $s \gg r$  regime is well described in the Stable Ecotype Model [15], which  
137 predicts that most of the genome will follow a single, clonal phylogeny. Genome-wide sweeps  
138 thus increase clonality and can be considered a hallmark of clonal populations (**Table 1, Figure**  
139 **1a**). In the  $r \gg s$  regime, individual genes (rather than entire genomes) will sweep to fixation  
140 (*i.e.* reach 100% frequency) in ecological niches to which they are adapted, without affecting  
141 genetic diversity elsewhere in the genome (**Figure 1b**). A recent model showed how these gene  
142 sweeps can occur at moderate (not unrealistically high) rates of recombination [18]. In this model,  
143 a microbial habitat is bombarded with genetically maladapted migrants, allowing gene sweeps to  
144 occur, although the adaptive allele never reaches 100% frequency due to the constant input of  
145 migrants. In another model, Takeuchi et al. [17] show that gene sweeps can occur when  $r$  is either  
146 very high or – counter-intuitively – when  $r$  is very low, but only when negative frequency-  
147 dependent selection (NFDS) reduces the rate of genome-wide selective sweeps. NFDS might be  
148 commonly imposed on bacteria and archaea by viral (phage) predation, providing a selective  
149 advantage to rare alleles of phage receptor genes [31].

150

## 151 **Genome-wide and gene-specific sweeps in nature**

152 To date, empirical evidence for gene-specific and genome-wide sweeps has come mostly from  
153 cross-sectional studies of a single population of genomes at a single point in time, with  
154 recombination and selection inferred backward in time [10-12,32]. Sequencing microbial  
155 genomes or metagenomes sampled over time – already a typical practice in genomic  
156 epidemiology (e.g. [26,33]) – promises to elucidate the rates of gene-specific and genome-wide  
157 sweeps in nature (**Figure 1**).

158 In a pioneering study, Bendall et al. [34] sampled a lake over 9 years and followed single-  
159 nucleotide polymorphism (SNP) and gene frequencies in 30 bacterial populations by  
160 metagenomic sequencing. They inferred that one of the populations (*Chlorobium*-111) had  
161 undergone a near-complete genome-wide sweep over the 9-year study, with most SNP diversity  
162 purged genome-wide (**Figure 1a**). In 6 other populations, they identified regions of the genome  
163 with unexpectedly low diversity compared to the genome-wide average, throughout the time-  
164 course. Either strong purifying selection on these regions or gene-specific selective sweeps  
165 (completed before the start of the time-course) could explain the low diversity. During the 9-year  
166 study, they also observed examples “where a few adjacent SNPs trended toward fixation while  
167 genome-wide diversity was maintained” (**Figure 1b**). They took this observation as consistent  
168 with gene-specific selective sweeps, but did not attempt to determine whether the sweeps were  
169 due to selection or drift. As a whole, the study showed that both genome-wide and gene-specific  
170 sweeps can occur in different microbial populations from the same environment. Whether  
171 microbial populations behaved differently due to differences in their ecology (*i.e.* regime of  
172 natural selection) or in their baseline recombination rates remains a question for future study. The  
173 fact that a genome-wide sweep was observed over a 9 year period suggests that such events might  
174 be relatively rapid but rare (only observed in 1 of 30 populations). Meanwhile, gene-sweeps  
175 might be more common historically (affecting 6 of 30 populations), but could take longer to  
176 proceed to completion.

177

## 178 **Is clonality a stable trait?**

179 As described in the *V. cholerae* example, some pathogenic bacterial populations can switch  
180 between panmictic and clonal lifestyles. Therefore clonality can vary over time, but how much  
181 and how often? To quantify the stability of clonality over time, I re-analyzed the lake time-course  
182 of Bendall et al. [34]. Because estimates of selection and recombination rates were not readily  
183 available for this dataset, I defined clonality based on the frequency of genome-wide selective  
184 sweeps. Frequent genome-wide selective sweeps suggest  $s \gg r$ , suggesting clonality. I identified  
185 20 “old, diverse” populations as those with a high density of SNPs (>1500 SNPs/Mbp) at the  
186 beginning of the time-course. These populations are likely “old” because they have gone a  
187 relatively long time since the last genome-wide purge of genetic diversity and are relatively non-  
188 clonal. They include the 6 populations inferred to have undergone gene-specific sweeps [34]. The  
189 remaining 10 populations were defined as “young, low-diversity,” having more recently  
190 experienced a genome-wide purge of diversity. The “old, diverse” populations have a relatively  
191 low ratio of nonsynonymous (N) to synonymous (S) SNPs, suggesting large effective population  
192 sizes and ample time for purifying selection to remove (mostly deleterious) nonsynonymous  
193 mutations (**Figure 2**). In contrast, the “young, low-diversity” populations are more likely to have  
194 high N:S ratios, suggesting smaller effective population sizes and less time for purifying selection  
195 to have acted.

196 With young (clonal) and old (less clonal) populations thus defined, I asked whether “old,  
197 diverse” populations tended to maintain their diversity through the 9-year period of the study.  
198 Bendall et al. defined two alternative population types: 1) those that maintained stable SNP  
199 diversity over 9 years, and 2) those that experienced significant fluctuations in diversity due to  
200 clonal expansions – defined when one, but not all timepoints are dominated by a single allele  
201 ( $\geq 95\%$  frequency) at >40% of SNP sites in the genome [34]. By definition, the 19 populations of  
202 the first type did not experience genome-wide sweeps during the study, while the 11 populations



203 of the second type did experience genome-wide purges of diversity, which were transient in 10  
204 cases and apparently permanent in 1 case (*Chlorobium*-111). Strikingly, 17 out of 20 “old,  
205 diverse” populations maintained their diversity over the 9-year study, compared to only 2 out of  
206 10 “young, low-diversity” populations (Fisher test, Odds Ratio = 19.4,  $P < 0.001$ ). This result  
207 suggests that populations with a history of genome-wide sweeps (and/or population bottlenecks)  
208 tend to experience subsequent genome-wide sweeps, and those that have maintained genetic  
209 diversity in the past tend to maintain their diversity into the future. In other words, clonality can  
210 be considered a relatively stable microbial trait.

211

### 212 **History repeats itself**

213 It appears that pathogens are more likely than free-living bacteria to undergo clonal expansions,  
214 due in part to their ecology and transmission dynamics [1,35]. Free-living aquatic bacteria, on the  
215 other hand, seem to be more likely to live in large, panmictic populations and behave like  
216 archipelagos [10-12,34]. If clonality is indeed a stable trait, this implies that history will repeat  
217 itself, and that the future behavior of microbial populations can be predicted with some  
218 confidence from their past behavior. Diverse populations tend to stay diverse. Clonal populations  
219 (that experience frequent genome-wide sweeps) tend to stay clonal. But history is not doomed to  
220 repeat itself forever. As we have seen, clonal expansions, such as pandemic *V. cholerae*, may  
221 originate when a panmictic gene pool (an archipelago) coalesces into a clonal continent, with  
222 virulence factors linked as peninsulas. Many such pathogenic clones have been documented, with  
223 life spans of decades to thousands of years [23,26,36,37]. Other pathogens, such as *Streptococcus*  
224 *pneumoniae*, may retain their panmictic population structure throughout an outbreak [38-40].  
225 Why some pathogens are clonal and others are panmictic is an open question, but surely depends  
226 on the balance between recombination and selection, and on the time scales considered.

227

228 **Acknowledgments.** I am grateful to Yan Boucher and Salvador Almagro-Moreno for their  
229 thoughtful comments which improved the manuscript. I was supported by a Canada Research  
230 Chair.

231 **Table 1. Extended island metaphors of microbial genome evolution.**

232

| Geographic metaphor | Genetic unit to which the metaphor applies | Type of selective sweep experience by the unit | Dominant mode of genetic transmission | Example                                                                                                 |
|---------------------|--------------------------------------------|------------------------------------------------|---------------------------------------|---------------------------------------------------------------------------------------------------------|
| Island              | Gene                                       | Gene-specific                                  | horizontal                            | genes in the <i>V. cholerae</i> integron [20,21]                                                        |
| Peninsula           | Gene                                       | Genome-wide                                    | vertical (clonal)                     | the cholera toxin gene, acquired horizontally, then linked to a clonal <i>V. cholerae</i> genome [8,19] |
| Continent           | Genome                                     | Genome-wide                                    | vertical (clonal)                     | clonal expansions of <i>S. aureus</i> [26] and <i>M. tuberculosis</i> [29,37]                           |
| Archipelago         | Genome                                     | Gene-specific                                  | horizontal                            | hotspring cyanobacteria [10], ocean vibrios [11,12], pneumococcus [38,40]                               |

233

234

## 235 **Figures**

236

### 237 **Figure 1. Temporal dynamics of genome-wide and gene-specific selective sweeps**

238 **inferred from metagenomic data.** Genetic diversity can be measured by mapping  
239 metagenomic sequence reads to a reference genome, identifying SNPs, and calculating  
240 the allele frequencies at each SNP position in the genome over time. The lowest possible  
241 genetic diversity occurs when a single allele is present in 100% of metagenomic reads.  
242 Alternatively, diversity could be defined in terms of gene presence/absence, based on  
243 relative coverage of a gene in the reference genome by metagenomic reads. **(a)** In a  
244 hypothetical genome-wide selective sweep, all positions in the genome tend toward low  
245 diversity over time. **(b)** In a hypothetical gene-specific selective sweep, only one or a few  
246 positions in the genome tend toward low diversity, while the rest of the genome maintains  
247 high or intermediate diversity.

248

249 **Figure 2. Past diversity predicts future diversity.** Based on data from Table 2 of  
250 Bendall et al. [34], the genome-wide average nonsynonymous to synonymous (N:S) SNP  
251 ratio was plotted against the total SNP density (SNPs per megabasepair) for each of 30  
252 bacterial populations. A pseudocount of 1 was added to both N and S counts. These 30  
253 populations were divided into 20 “old, diverse” populations (>1500 SNPs/Mbp) and 10  
254 “young, low-diversity” populations (<1500 SNPs/Mbp), highlighted in blue and yellow,  
255 respectively. Each point represents one of the 30 populations, colored in black if diversity  
256 was maintained over a 9-year metagenomic time-course, or in red if it was not. Seventeen  
257 out of 20 “old, diverse” populations maintained their diversity over the 9-year study,  
258 compared to only 2 out of 10 “young, low-diversity” populations (Fisher test, Odds Ratio  
259 = 19.4,  $P < 0.001$ ). Consistent with previous observations that N:S depends on the  
260 evolutionary time available for purifying selection to act [41,42], N:S is negatively  
261 correlated with SNPs/Mbp, a proxy for evolutionary time or the time since the last  
262 genome-wide purge of genetic diversity in this dataset (Pearson’s correlation of  $\log_{10}$   
263 transformed data,  $r = -0.81$ ,  $P = 5.6e-8$ ).

264 **References**

265

266 1. Smith JM, Smith NH, O'Rourke M, Spratt BG: **How clonal are bacteria?** *Proc. Natl.*  
267 *Acad. Sci. USA* 1993, **90**:4384–4388.

268 2. Guttman DS, Dykhuizen DE: **Clonal Divergence in Escherichia coli as a Result of**  
269 **Recombination, Not Mutation.** *Science* 1994, **266**:1380–1383.

270 3. Hacker J, Blum-Oehler G, Mühldorfer I, Tschäpe H: **Pathogenicity islands of virulent**  
271 **bacteria: structure, function and impact on microbial evolution.** *Mol Microbiol* 1997,  
272 **23**:1089–1097.

273 4. Coleman ML, Sullivan MB, Martiny AC, Steglich C, Barry K, Delong EF, Chisholm SW:  
274 **Genomic islands and the ecology and evolution of Prochlorococcus.** *Science* 2006,  
275 **311**:1768–1770.

276 5. Coleman ML, Chisholm SW: **Ecosystem-specific selection pressures revealed through**  
277 **comparative population genomics.** *Proc. Natl. Acad. Sci. USA* 2010, **107**:18634–18639.

278 6. Shapiro BJ: **Signatures of natural selection and ecological differentiation in microbial**  
279 **genomes.** *Advances in experimental medicine and biology* 2014, **781**:339–359.

280 7. Rasmussen S, Allentoft ME, Nielsen K, Orlando L, Sikora M, Sjögren K-G, Pedersen AG,  
281 Schubert M, Van Dam A, Kapel CMO, et al.: **Early Divergent Strains of Yersinia pestis**  
282 **in Eurasia 5,000 Years Ago.** *Cell* 2015, **163**:571–582.

283 8. Waldor MKM, Mekalanos JJJ: **Lysogenic conversion by a filamentous phage encoding**  
284 **cholera toxin.** *Science* 1996, **272**:1910–1914.

285 9. Chun J, Grim CJ, Hasan NA, Lee JH, Choi SY, Haley BJ, Taviani E, Jeon Y-S, Kim DW,  
286 Lee J-H, et al.: **Comparative genomics reveals mechanism for short-term and long-**  
287 **term clonal transitions in pandemic Vibrio cholerae.** *Proc. Natl. Acad. Sci. USA* 2009,  
288 **106**:15442–15447.

289 10. Rosen MJ, Davison M, Bhaya D, Fisher DS: **Fine-scale diversity and extensive**  
290 **recombination in a quasisexual bacterial population occupying a broad niche.** *Science*  
291 2015, **348**:1019–1023.

292 \* Deep sequencing of 90 cyanobacterial marker genes reveals extensive recombination, with each  
293 genome composed of a random mix of alleles from the gene pool.

294

295 11. Cui Y, Yang X, Didelot X, Guo C, Li D, Yan Y, Zhang Y, Yuan Y, Yang H, Wang J, et  
296 al.: **Epidemic Clones, Oceanic Gene Pools, and Eco-LD in the Free Living Marine**  
297 **Pathogen Vibrio parahaemolyticus.** *Mol Biol Evol* 2015, **32**:1396–1410.

298 \* In-depth population genomic evidence of a panmictic ocean gene pool containing non-clonal  
299 ecological populations.

300

301 12. Shapiro BJ, Friedman J, Cordero OX, Preheim SP, Timberlake SC, Szabo G, Polz MF,  
302 Alm EJ: **Population Genomics of Early Events in the Ecological Differentiation of**  
303 **Bacteria.** *Science* 2012, **336**:48–51.

- 304 13. Vulić M, Dionisio F, Taddei F, Radman M: **Molecular keys to speciation: DNA**  
305 **polymorphism and the control of genetic exchange in enterobacteria.** *Proc. Natl.*  
306 *Acad. Sci. USA* 1997, **94**:9763–9767.
- 307 14. Majewski JJ, Cohan FMF: **DNA sequence similarity requirements for interspecific**  
308 **recombination in *Bacillus*.** *Genetics* 1999, **153**:1525–1533.
- 309 15. Wiedenbeck J, Cohan FM: **Origins of bacterial diversity through horizontal genetic**  
310 **transfer and adaptation to new ecological niches.** *FEMS Microbiology Reviews* 2011,  
311 **35**:957–976.
- 312 16. Shapiro BJ, Polz MF: **Ordering microbial diversity into ecologically and genetically**  
313 **cohesive units.** *Trends Microbiol* 2014, **22**:235–247.
- 314 \* A comprehensive discussion of the roles of selection and recombination in structuring microbial  
315 diversity.  
316
- 317 17. Takeuchi N, Cordero OX, Koonin EV, Kaneko K: **Gene-specific selective sweeps in**  
318 **bacteria and archaea caused by negative frequency-dependent selection.** *BMC*  
319 *Biology* 2015, **13**:20.
- 320 \* Mathematical modeling shows how individual genes can sweep through populations with low  
321 recombination rates in the presence of negative frequency-dependent selection.  
322
- 323 18. Niehus R, Mitri S, Fletcher AG, Foster KR: **Migration and horizontal gene transfer**  
324 **divide microbial genomes into multiple niches.** *Nature Communications* 2015, **6**:1–9.
- 325 19. Mutreja A, Kim DW, Thomson NR, Connor TR, Lee JH, Kariuki S, Croucher NJ, Choi  
326 SY, Harris SR, Lebens M, et al.: **Evidence for several waves of global transmission in**  
327 **the seventh cholera pandemic.** *Nature* 2011, **477**:462–U111.
- 328 20. Orata FD, Kirchberger PC, Méheust R, Barlow EJ, Tarr CL, Boucher Y: **The Dynamics**  
329 **of Genetic Interactions between *Vibrio metoecus* and *Vibrio cholerae*, Two Close**  
330 **Relatives Co-Occurring in the Environment.** *Genome Biol Evol* 2015, **7**:2941–2954.
- 331 \* A clear demonstration that genes in the integron are recombined between species just as often  
332 as within species, and that 24% of ‘core’ genes have crossed species boundaries.  
333
- 334 21. Boucher Y, Cordero OX, Takemura A, Hunt DE, Schliep K, Baptiste E, Lopez P, Tarr  
335 CL, Polz MF: **Local Mobile Gene Pools Rapidly Cross Species Boundaries To Create**  
336 **Endemicity within Global *Vibrio cholerae* Populations.** *mBio* 2011, **2**:e00335–10.
- 337 22. Boucher Y, Orata FD, Alam M: **The out-of-the-delta hypothesis: dense human**  
338 **populations in low-lying river deltas served as agents for the evolution of a deadly**  
339 **pathogen.** *Front Microbiol* 2015, **6**:1120.
- 340 23. Mentzer von A, Connor TR, Wieler LH, Semmler T, Iguchi A, Thomson NR, Rasko DA,  
341 Joffre E, Corander J, Pickard D, et al.: **Identification of enterotoxigenic *Escherichia coli***  
342 **(ETEC) clades with long-term global distribution.** *Nature Genetics* 2014, **46**:1321–  
343 1326.

- 344 24. Cao Q, Didelot X, Wu Z, Li Z, He L, Li Y, Ni M, You Y, Lin X, Li Z, et al.: **Progressive**  
345 **genomic convergence of two *Helicobacter pylori* strains during mixed infection of a**  
346 **patient with chronic gastritis.** *Gut* 2015, **64**:554–561.
- 347 25. Vos M, Didelot X: **A comparison of homologous recombination rates in bacteria and**  
348 **archaea.** *The ISME journal* 2009, **3**:199–208.
- 349 26. Baines SL, Holt KE, Schultz MB, Seemann T, Howden BO, Jensen SO, van Hal SJ,  
350 Coombs GW, Firth N, Powell DR, et al.: **Convergent adaptation in the dominant global**  
351 **hospital clone ST239 of methicillin-resistant *Staphylococcus aureus*.** *mBio* 2015,  
352 **6**:e00080.
- 353 27. Hershberg R, Lipatov M, Small PM, Sheffer H, Niemann S, Homolka S, Roach JC,  
354 Kremer K, Petrov DA, Feldman MW, et al.: **High Functional Diversity in**  
355 ***Mycobacterium tuberculosis* Driven by Genetic Drift and Human Demography.** *Plos*  
356 *Biol* 2008, **6**:e311.
- 357 28. Namouchi A, Didelot X, Schock U, Gicquel B, Rocha EPC: **After the bottleneck:**  
358 **Genome-wide diversification of the *Mycobacterium tuberculosis* complex by mutation,**  
359 **recombination, and natural selection.** *Genome Research* 2012, **22**:721–734.
- 360 29. Casali N, Nikolayevskyy V, Balabanova Y, Harris SR, Ignatyeva O, Kontsevaya I,  
361 Corander J, Bryant J, Parkhill J, Nejentsev S, et al.: **Evolution and transmission of drug-**  
362 **resistant tuberculosis in a Russian population.** *Nature Genetics* 2014, **46**:279–286.
- 363 30. Yahara K, Didelot X, Jolley KA, Kobayashi I, Maiden MCJ, Sheppard SK, Falush D: **The**  
364 **landscape of realized homologous recombination in pathogenic bacteria.** *Mol Biol*  
365 *Evol* 2015, doi:10.1093/molbev/msv237.
- 366 31. Cordero OX, Polz MF: **Explaining microbial genomic diversity in light of evolutionary**  
367 **ecology.** *Nature Reviews Microbiology* 2014, **12**:263–273.
- 368 32. Cadillo-Quiroz H, Didelot X, Held NL, Herrera A, Darling A, Reno ML, Krause DJ,  
369 Whitaker RJ: **Patterns of Gene Flow Define Species of Thermophilic Archaea.** *Plos*  
370 *Biol* 2012, **10**:e1001265.
- 371 33. Croucher NJ, Didelot X: **The application of genomics to tracing bacterial pathogen**  
372 **transmission.** *Current Opinion in Microbiology* 2015, **23**:62–67.
- 373 34. Bendall ML, Stevens SL, Chan L-K, Malfatti S, Schwientek P, Tremblay J, Schackwitz  
374 W, Martin J, Pati A, Bushnell B, et al.: **Genome-wide selective sweeps and gene-specific**  
375 **sweeps in natural bacterial populations.** *The ISME journal* 2016,  
376 **doi:10.1038/ismej.2015.241**
- 377 \* A pioneering application of time-course metagenomics to infer genome-wide and gene-specific  
378 selective sweeps in natural lake bacterial populations.  
379
- 380 35. Achtman M, Wagner M: **Microbial diversity and the genetic nature of microbial**  
381 **species.** *Nature Reviews Microbiology* 2008, **6**:431–440.
- 382 36. Snitkin ES, Zelazny AM, Thomas PJ, Stock F, NISC Comparative Sequencing Program,

- 383 Henderson DK, Palmore TN, Segre JA: **Tracking a Hospital Outbreak of Carbapenem-**  
384 **Resistant *Klebsiella pneumoniae* with Whole-Genome Sequencing.** *Science*  
385 *Translational Medicine* 2012, **4**:148ra116.
- 386 37. Comas I, Coscolla M, Luo T, Borrell S, Holt KE, Kato-Maeda M, Parkhill J, Malla B,  
387 Berg S, Thwaites G, et al.: **Out-of-Africa migration and Neolithic coexpansion of**  
388 ***Mycobacterium tuberculosis* with modern humans.** *Nature Genetics* 2013, **45**:1176–  
389 1182.
- 390 38. Croucher NJ, Finkelstein JA, Pelton SI, Mitchell PK, Lee GM, Parkhill J, Bentley SD,  
391 Hanage WP, Lipsitch M: **Population genomics of post-vaccine changes in**  
392 **pneumococcal epidemiology.** *Nature Genetics* 2013, **45**:656–663.
- 393 39. Chewapreecha C, Harris SR, Croucher NJ, Turner C, Marttinen P, Cheng L, Pessia A,  
394 Aanensen DM, Mather AE, Page AJ, et al.: **Dense genomic sampling identifies**  
395 **highways of pneumococcal recombination.** *Nature Genetics* 2014, **46**:305–309.
- 396 40. Marttinen P, Croucher NJ, Gutmann MU, Corander J, Hanage WP: **Recombination**  
397 **produces coherent bacterial species clusters in both core and accessory genomes.**  
398 *Microbial Genomics* 2015, DOI: [10.1099/mgen.0.000038](https://doi.org/10.1099/mgen.0.000038).
- 399 \* The first simulation of bacterial evolution including mutation, allelic exchange (homologous  
400 recombination) and gene gain/loss (non-homologous recombination).  
401
- 402 41. Rocha EP, Smith JM, Hurst LD, Holden MT, Cooper JE, Smith NH, Feil EJ:  
403 **Comparisons of dN/dS are time dependent for closely related bacterial genomes.** *J*  
404 *Theor Biol* 2006, **239**:226–235.
- 405 42. Kryazhimskiy S, Plotkin JB: **The Population Genetics of dN/dS.** *PLoS Genet* 2008,  
406 **4**:e1000304.
- 407

Figure 1

(a) Genome-wide sweep

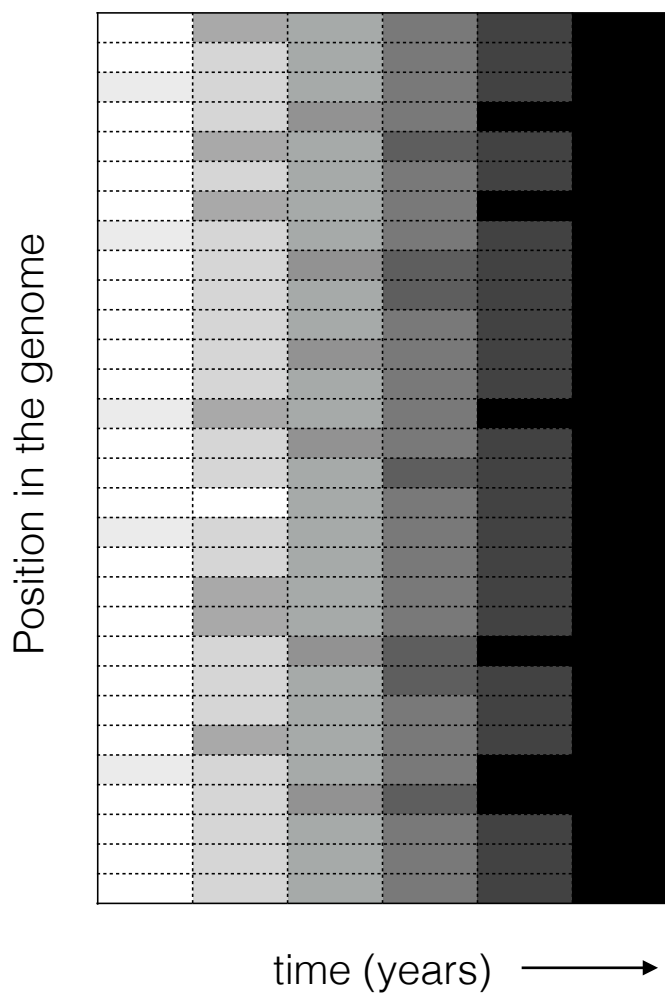

(b) Gene-specific sweeps

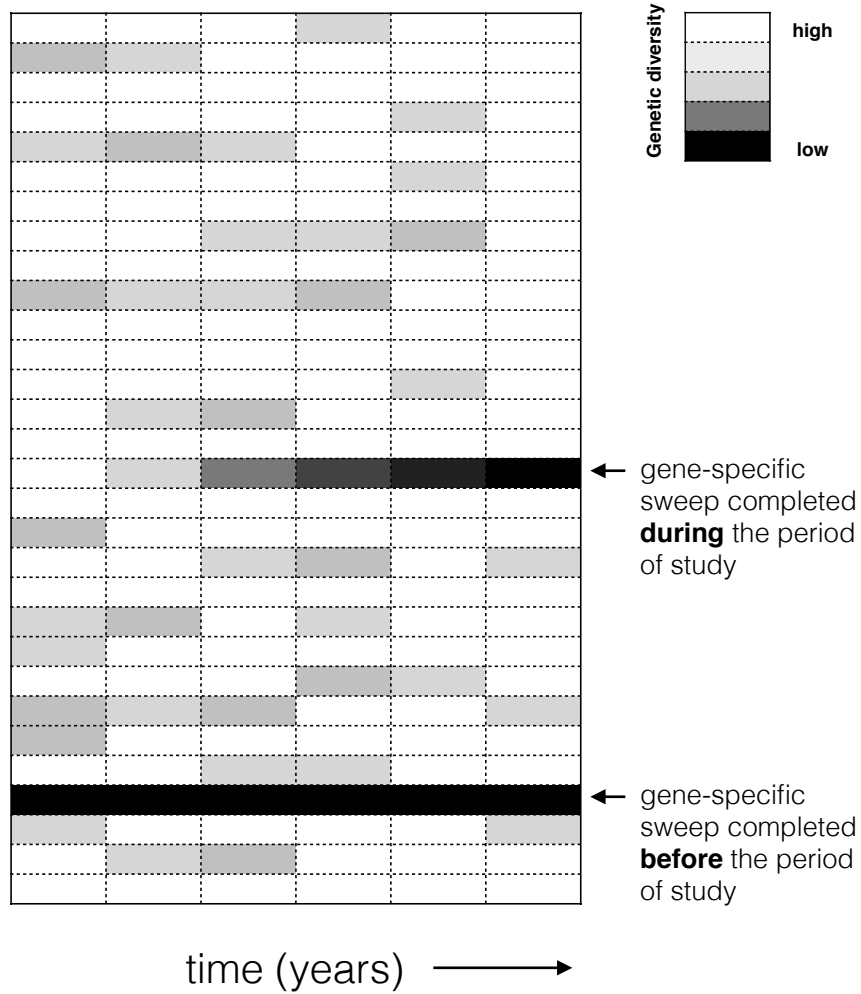

Legend

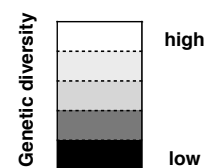



Figure 2

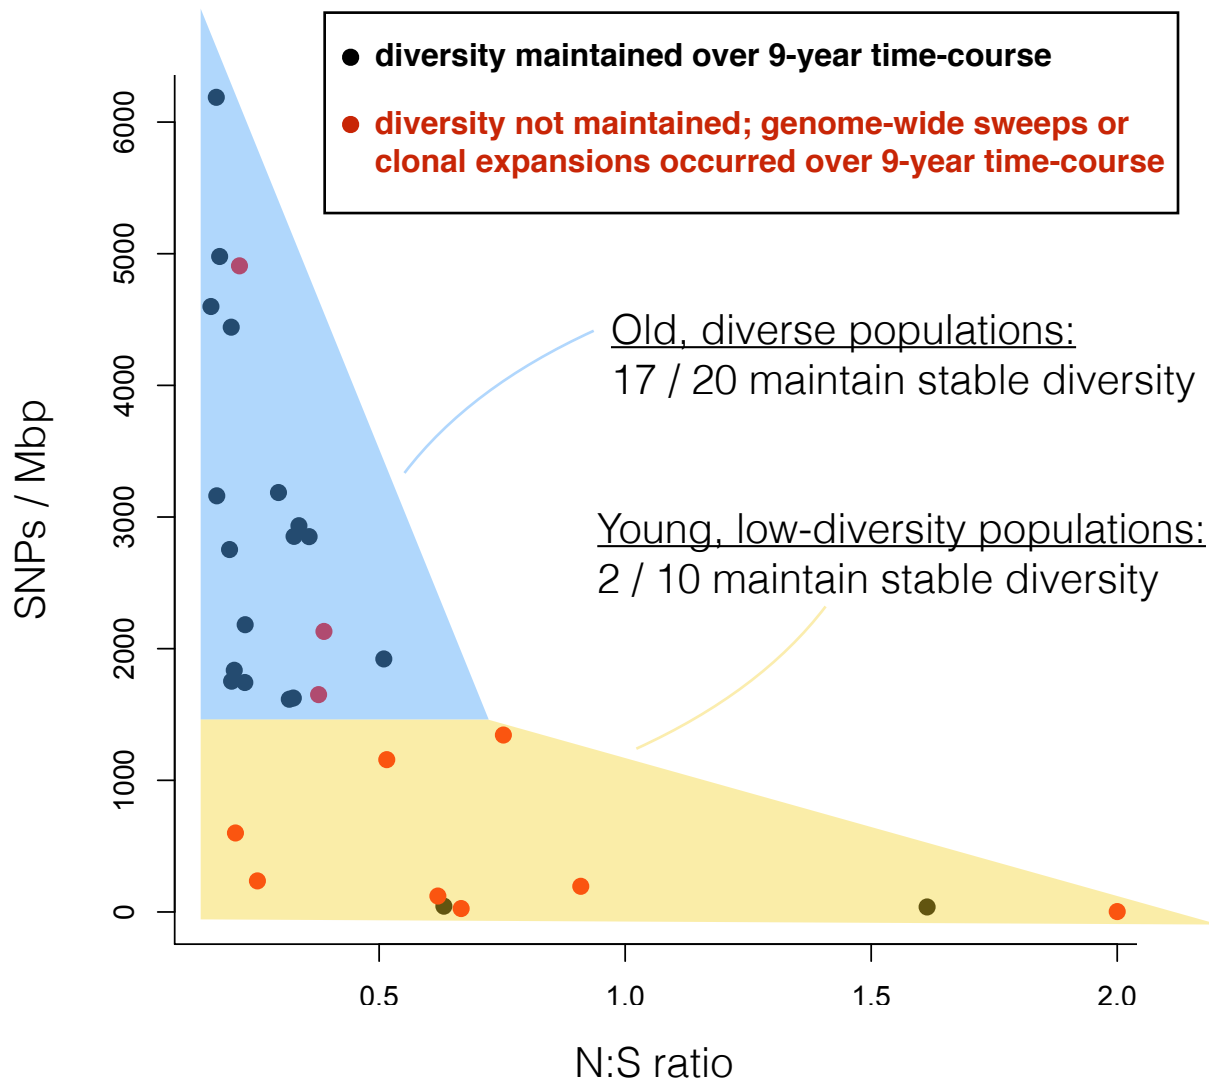

Source: http://biorxiv.org/content/10.1101/036780v1.full.pdf
